# Supplementary material for: Exploring the genetic basis of fatty liver development in geese
Source: PubMed Central journal article supplement (PMC7459336; doi:10.1038/s41598-020-71210-8), 2020-08-31
Supplement: 41598_2020_71210_MOESM1_ESM.pdf [file 41598_2020_71210_MOESM1_ESM.pdf]

## **Exploring the genetic basis of fatty liver development in Geese**

**Yunzhou Yang<sup>1,2\*</sup>, Huiying Wang<sup>1</sup>, Guangquan Li<sup>1</sup>, Yi Liu<sup>1</sup>, Cui Wang<sup>1</sup>, Daqian He<sup>1\*</sup>**

<sup>1</sup>Institute of Animal Husbandry & Veterinary Science, Shanghai Academy of Agricultural Sciences, Shanghai, 201106, P.R. China

<sup>2</sup>Department of Medical Biochemistry and Microbiology, Uppsala University, Uppsala, 75123, Sweden

### **\*Corresponding author:**

**Daqian He**

Institute of Animal Husbandry & Veterinary Science  
Shanghai Academy of Agricultural Sciences  
201106, Minhang District  
Shanghai, PR China  
Tel: +86-021-62205473  
daqianhe@aliyun.com

**Yunzhou Yang**

Institute of Animal Husbandry & Veterinary Science  
Shanghai Academy of Agricultural Sciences  
201106, Minhang District  
Shanghai, P.R. China  
Tel: +86-021-62205473  
Department of Medical Biochemistry and Microbiology  
Uppsala University  
75 123, Husargatan 3  
Uppsala, Sweden  
Tel: +46-0790111308  
yang.yunzhou@imbim.uu.se

## Supplementary Figures

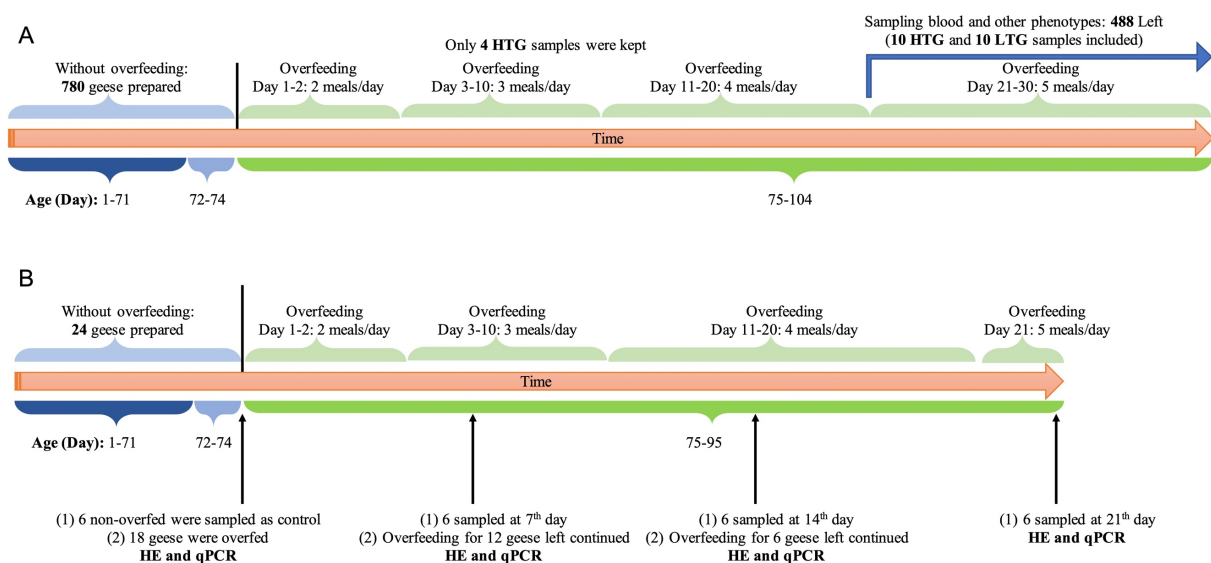

**Figure S1** Experiment design. Two experiments were carried out in our study. In Figure A, all 780 geese were initially selected for overfeeding experiments. After 30 days overfeeding, 488 geese were kept for final analysis. Weight indices (WIs) and biochemistry indices (BCIs) were all recorded and tested. Samples with extremely high- (14) and low-TG (10) were also phenotyped. In Figure B, 24 geese were overfed for 3 weeks (one group was overfed) to do HE staining and qPCR. At each time point, we have 6 samples as biological replicates.

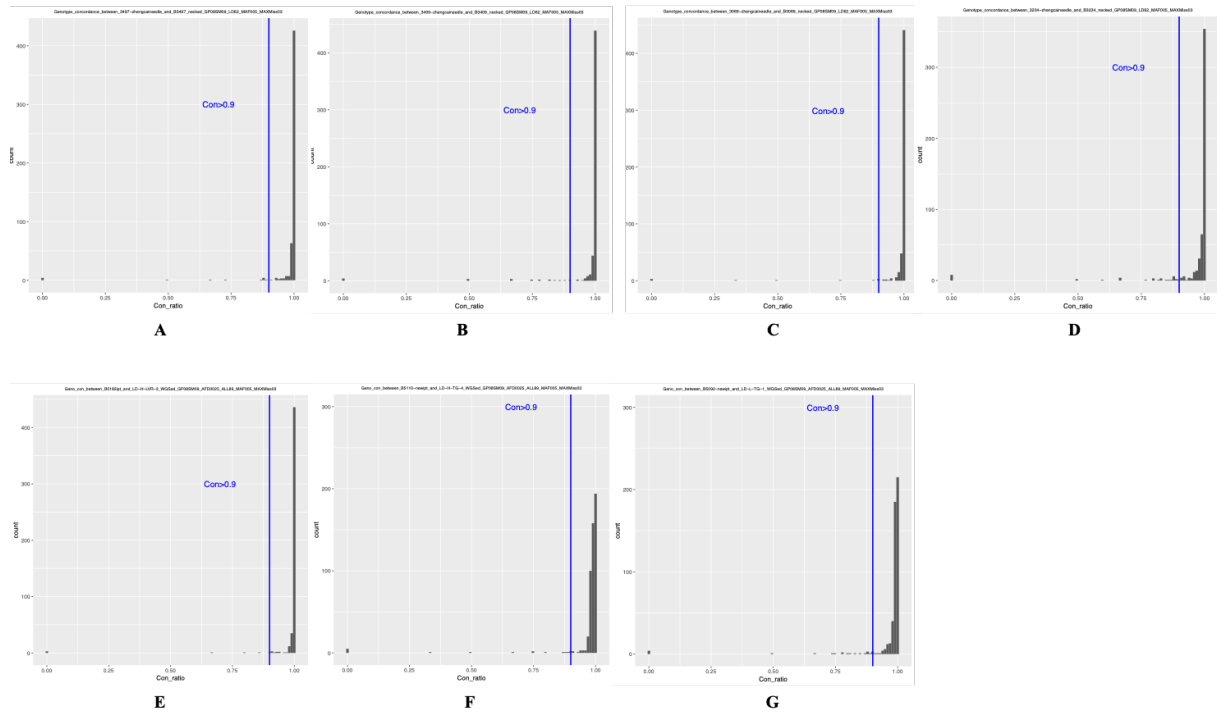

**Figure S2 Genotype concordance between repeated samples for 2bRAD methods.** Figures A - D: concordance between replicated samples in 2b-RAD experiments. Figures E - F: concordance between imputed and re-sequenced samples. Blue vertical lines indicated 90% concordance threshold.

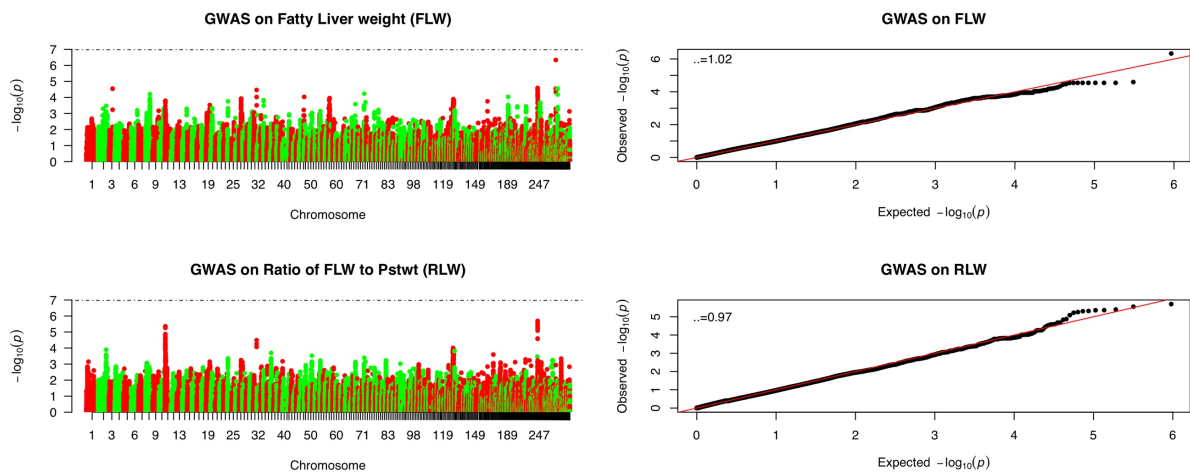

**Figure S3 GWAS on RLW (ratio of fatty liver to body weight after overfeeding) and FLW (fatty liver weight).** Numbers shown in Q-Q plots were inflation arguments which indicated much less population stratification confounders. Also, scaffold numbers here are defined for more readable information and details could be found in Table S2.

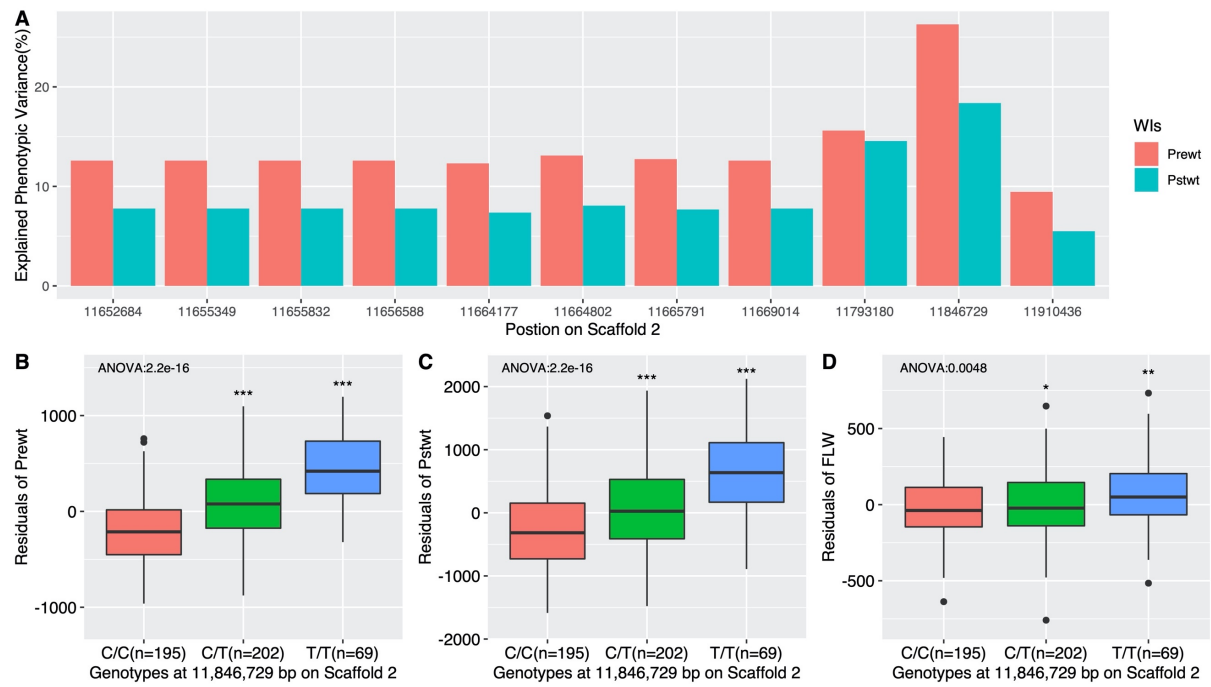

**Figure S4** Explained phenotypic variance by all 11 SNPs on scaffold 2 in both Prewt and Pstwt. A: explained variance along the positions on scaffold 2 (NW\_013185655.1) in Prewt (red) and Pstwt (green). B – D are phenotypic residuals by fitting sex, worker and overfeeding method with Prewt and Pstwt for three different genotypes at 11,846,729.

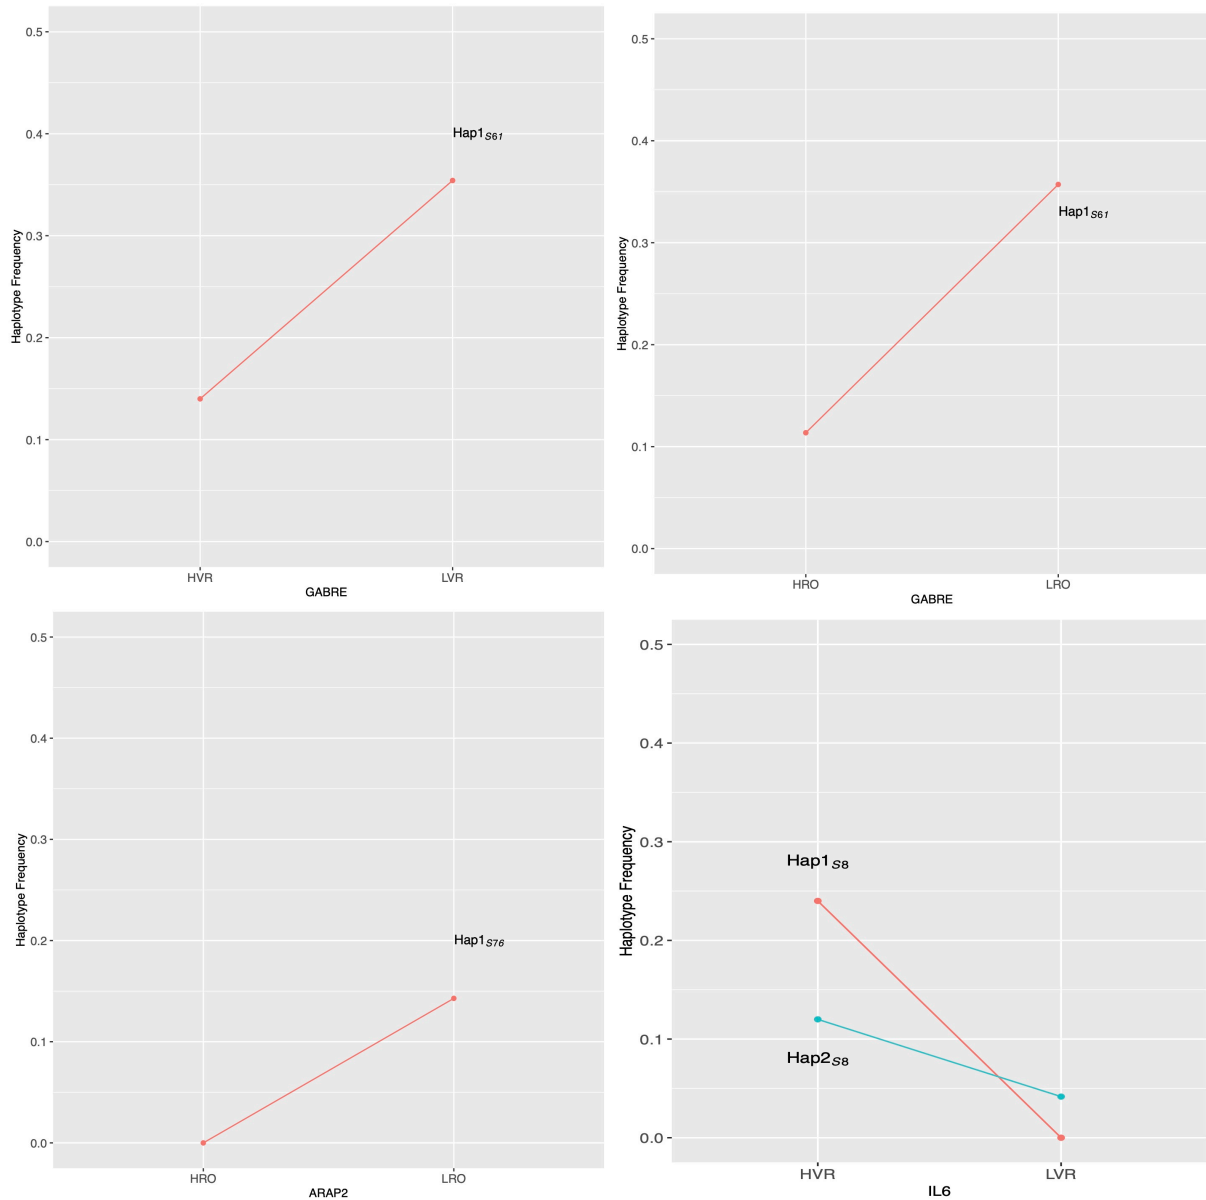

**Figure S5 Haplotypes Frequencies around GABRE, ARAP2 and IL6.** A: Frequency of haplotypes around GABRE between High- and Low-FLW. B: Frequency of haplotypes around GABRE between High- and Low-RLW. C: Frequency of haplotypes around ARAP2 between High- and Low-RLW, D: Frequency of haplotypes around IL6 between High- and Low-FLW.

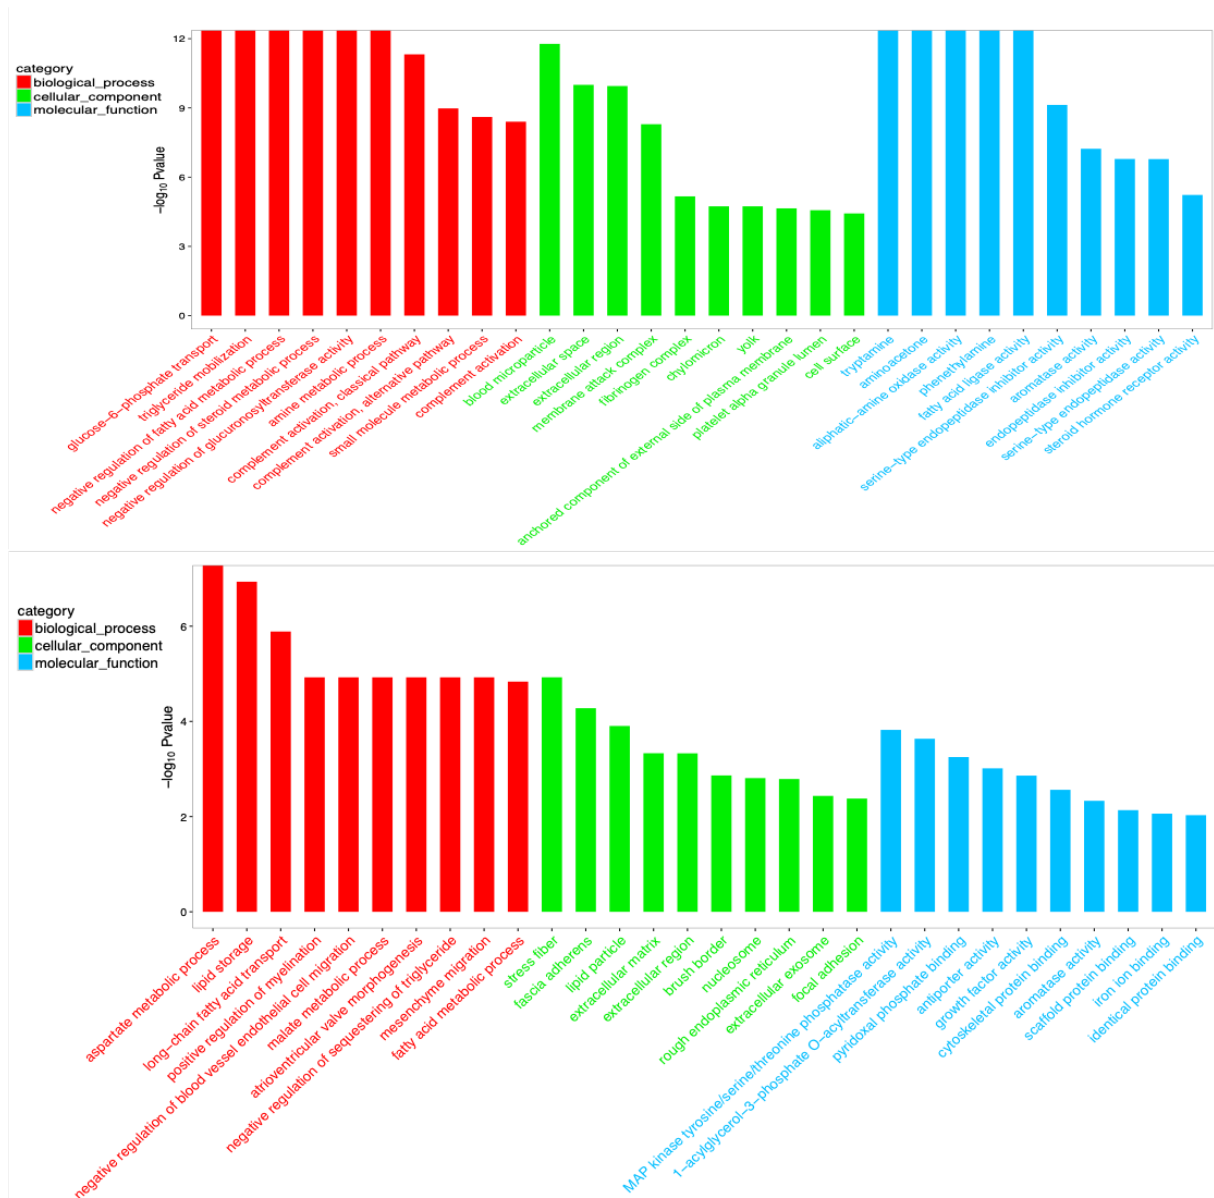

**Figure S6 Top 10 GO terms with down or up regulated genes.** Above: GO terms in Landes geese. Below: GO terms in ZheDong White geese.

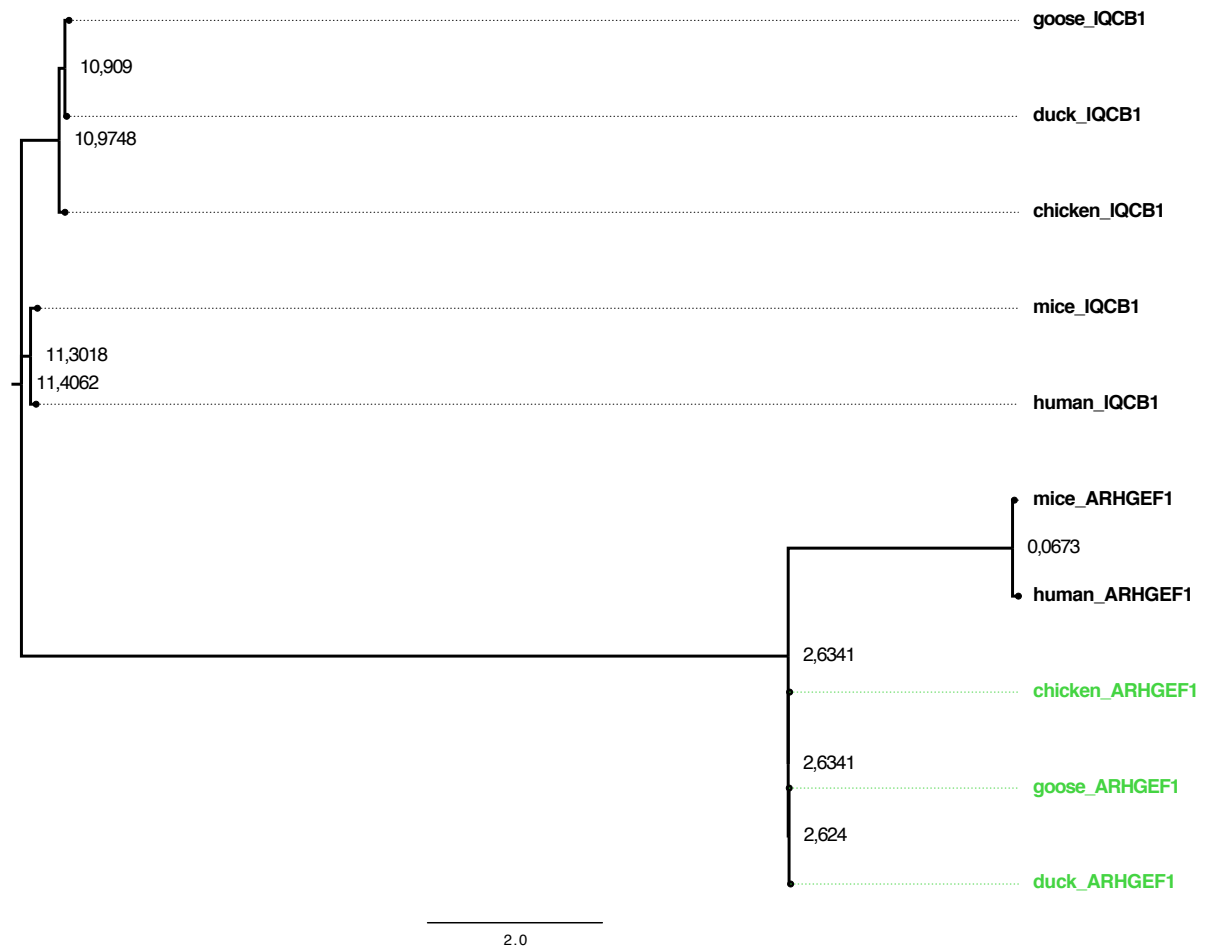

**Figure S7 Phylogeny tree based on maximum likelihood algorithms.** The tree was constructed by MEGA7 software<sup>1</sup> with 1000 bootstrap values. The figure was plotted by Figtree 1.4.4<sup>2</sup>. Protein sequences of IQCB1 and ARHGEF1 gene in goose, chicken, duck, human and mice were downloaded from NCBI. Accession number for IQCB1 gene: human- NP\_001306036.1, mice- XP\_006522312.1, chicken- XP\_422091.4, duck- XP\_027318051.1, goose- XP\_013026575.1. Accession number for ARHGEF1 gene: human-NP\_004697.2, mice-NP\_001123623.1, chicken-XP\_025008345.1, duck-XP\_027318050.1, goose-XP\_013026666.1.

## Supplementary Tables

**Table S1 Correlations among different phenotypes. Upper triangle is the *Pearson* correlations. lower triangle is the p values.**

| WIs/BCIs* | Prewt | OFM  | Pstwt | OFG   | FLW  | ABW  | RLW   | AST   | ALT   | TBIL | DBIL  | TC   | TG    | HDL   | TBA   | GLU   | LDL   | VLDL  | PIII  | HA    |
|-----------|-------|------|-------|-------|------|------|-------|-------|-------|------|-------|------|-------|-------|-------|-------|-------|-------|-------|-------|
| Prewt     | 1.00  | 0.08 | 0.68  | -0.08 | 0.15 | 0.28 | -0.15 | 0.00  | 0.01  | 0.12 | 0.02  | 0.03 | -0.03 | 0.05  | 0.20  | -0.07 | -0.02 | -0.04 | 0.02  | -0.08 |
| OFM       | 1.00  | 1.00 | 0.49  | 0.59  | 0.24 | 0.47 | 0.05  | -0.11 | -0.05 | 0.13 | 0.11  | 0.21 | 0.22  | 0.05  | 0.15  | -0.06 | 0.26  | 0.11  | 0.10  | -0.02 |
| Pstwt     | 0.00  | 0.00 | 1.00  | 0.68  | 0.45 | 0.50 | 0.04  | -0.03 | 0.00  | 0.10 | 0.08  | 0.08 | 0.12  | 0.05  | 0.23  | -0.09 | 0.05  | 0.02  | 0.04  | -0.06 |
| OFG       | 1.00  | 0.00 | 0.00  | 1.00  | 0.46 | 0.41 | 0.21  | -0.04 | -0.01 | 0.02 | 0.09  | 0.08 | 0.19  | 0.02  | 0.12  | -0.06 | 0.09  | 0.07  | 0.04  | 0.00  |
| FLW       | 1.00  | 0.07 | 0.00  | 0.00  | 1.00 | 0.14 | 0.91  | 0.08  | 0.07  | 0.29 | 0.41  | 0.05 | 0.15  | -0.06 | 0.28  | -0.12 | 0.06  | 0.04  | -0.05 | 0.02  |
| ABW       | 0.00  | 0.00 | 0.00  | 0.00  | 1.00 | 1.00 | -0.08 | -0.12 | -0.07 | 0.07 | -0.01 | 0.14 | 0.13  | 0.12  | 0.15  | -0.04 | 0.16  | 0.04  | 0.04  | -0.13 |
| RLW       | 1.00  | 1.00 | 1.00  | 0.64  | 0.00 | 1.00 | 1.00  | 0.10  | 0.08  | 0.27 | 0.41  | 0.01 | 0.12  | -0.09 | 0.20  | -0.11 | 0.05  | 0.04  | -0.07 | 0.04  |
| AST       | 1.00  | 1.00 | 1.00  | 1.00  | 1.00 | 1.00 | 1.00  | 1.00  | 0.95  | 0.13 | 0.16  | 0.03 | -0.01 | -0.01 | -0.01 | 0.19  | 0.02  | -0.01 | -0.06 | 0.24  |
| ALT       | 1.00  | 1.00 | 1.00  | 1.00  | 1.00 | 1.00 | 1.00  | 0.00  | 1.00  | 0.19 | 0.22  | 0.13 | 0.04  | 0.09  | 0.06  | 0.22  | 0.11  | 0.03  | -0.06 | 0.25  |
| TBIL      | 1.00  | 1.00 | 1.00  | 1.00  | 0.00 | 1.00 | 0.01  | 1.00  | 1.00  | 1.00 | 0.87  | 0.41 | 0.15  | 0.27  | 0.26  | 0.28  | 0.41  | 0.08  | -0.09 | 0.05  |
| DBIL      | 1.00  | 1.00 | 1.00  | 1.00  | 0.00 | 1.00 | 0.00  | 1.00  | 0.34  | 0.00 | 1.00  | 0.38 | 0.20  | 0.21  | 0.23  | 0.26  | 0.39  | 0.09  | -0.03 | 0.09  |
| TC        | 1.00  | 0.51 | 1.00  | 1.00  | 1.00 | 1.00 | 1.00  | 1.00  | 1.00  | 0.00 | 0.00  | 1.00 | 0.31  | 0.78  | 0.50  | 0.28  | 0.91  | 0.09  | 0.04  | 0.10  |
| TG        | 1.00  | 0.30 | 1.00  | 1.00  | 1.00 | 1.00 | 1.00  | 1.00  | 1.00  | 1.00 | 1.00  | 0.00 | 1.00  | -0.04 | 0.23  | 0.05  | 0.38  | 0.40  | 0.52  | 0.10  |
| HDL       | 1.00  | 1.00 | 1.00  | 1.00  | 1.00 | 1.00 | 1.00  | 1.00  | 1.00  | 0.01 | 0.43  | 0.00 | 1.00  | 1.00  | 0.44  | 0.22  | 0.61  | -0.24 | -0.15 | 0.02  |
| TBA       | 1.00  | 1.00 | 0.11  | 1.00  | 0.00 | 1.00 | 0.82  | 1.00  | 1.00  | 0.01 | 0.15  | 0.00 | 0.15  | 0.00  | 1.00  | -0.21 | 0.45  | 0.15  | -0.07 | -0.10 |
| GLU       | 1.00  | 1.00 | 1.00  | 1.00  | 1.00 | 1.00 | 1.00  | 1.00  | 0.39  | 0.00 | 0.02  | 0.00 | 1.00  | 0.27  | 0.73  | 1.00  | 0.20  | -0.07 | -0.03 | 0.36  |
| LDL       | 1.00  | 0.02 | 1.00  | 1.00  | 1.00 | 1.00 | 1.00  | 1.00  | 1.00  | 0.00 | 0.00  | 0.00 | 0.00  | 0.00  | 0.00  | 1.00  | 1.00  | 0.22  | 0.11  | 0.06  |
| VLDL      | 1.00  | 1.00 | 1.00  | 1.00  | 1.00 | 1.00 | 1.00  | 1.00  | 1.00  | 1.00 | 1.00  | 1.00 | 0.00  | 0.09  | 1.00  | 1.00  | 0.30  | 1.00  | 0.10  | -0.05 |
| PIII      | 1.00  | 1.00 | 1.00  | 1.00  | 1.00 | 1.00 | 1.00  | 1.00  | 1.00  | 1.00 | 1.00  | 1.00 | 0.00  | 1.00  | 1.00  | 1.00  | 1.00  | 1.00  | 1.00  | 0.20  |
| HA        | 1.00  | 1.00 | 1.00  | 1.00  | 1.00 | 1.00 | 1.00  | 0.08  | 0.04  | 1.00 | 1.00  | 1.00 | 1.00  | 1.00  | 1.00  | 0.00  | 1.00  | 1.00  | 1.00  | 1.00  |

\* WIs and BCIs are abbreviations for weight indices (including body weight before overfeeding-Prewt. body weight after overfeeding-Pstwt. fatty liver weight-FLW. body weight gain after overfeeding-OFG. abdominal fat weight after overfeeding-ABW) and biochemical indices. RLW is ratio of FLW to Pstwt. AST (Aspartate transaminase). ALT (Alanine transaminase). DBIL (Direct blood bilirubin). TBIL (Direct blood bilirubin). GLU (Blood glucose). TBA (Total bile acid). VLDL (Very low-density lipoprotein). HDL (High density lipoprotein). LDL (Low density lipoprotein). TC (Total cholesterol). TG (Triglyceride). PIII (N-terminal procollagen III) and HA (Hyaluronic acid).



**Table S2 Genetic correlations among weight indices**

| WIs*  | Prewt | Pstwt | FLW  | ABW   | OFG  | RLW   | OFM   |
|-------|-------|-------|------|-------|------|-------|-------|
| Prewt | 1     | 0.94  | 0.26 | 0.45  | 0.09 | -0.33 | 0.23  |
| Pstwt | 0.94  | 1     | 0.48 | 0.65  | 0.41 | -0.13 | 0.47  |
| FLW   | 0.26  | 0.48  | 1    | 0.28  | 0.59 | 0.81  | 0.07  |
| ABW   | 0.45  | 0.65  | 0.28 | 1     | 0.61 | -0.13 | 0.7   |
| OFG   | 0.09  | 0.41  | 0.59 | 0.61  | 1    | 0.4   | 0.55  |
| RLW   | -0.33 | -0.13 | 0.81 | -0.13 | 0.4  | 1     | -0.23 |
| OFM   | 0.23  | 0.47  | 0.07 | 0.7   | 0.55 | -0.23 | 1     |

\* WIs refer to weight indices, including body weight without/with overfeeding (Prewt and Pstwt), fatty liver weight (FLW), abdominal fat weight (ABW), body weight gain (OFG), ratio of FLW in Pstwt (RLW). OFM refers to number of meals when overfeeding was ended.

**Table S3 Candidate genomic regions associated with RLW FLW and Blood lipid**

| Scaffold | Scaffold       | Scaffold Num | Start    | End       | Genes                     | Detected by |
|----------|----------------|--------------|----------|-----------|---------------------------|-------------|
| 2        | NW_013185655.1 | 45           | 17518072 | 17558 550 | VRK1                      | GWAS        |
| 11       | NW_013185664.1 | 61           | 970437   | 1029601   | MYT1L                     | GWAS        |
| 72       | NW_013185725.1 | 36           | 618053   | 618053    | BAZ1A                     | GWAS        |
| 128      | NW_013185781.1 | 109          | 573320   | 1 975438  | OSBPL5. MOB2              | GWAS        |
| 243      | NW_013185896.1 | 267          | 781442   | 781442    | MDGA2                     | GWAS        |
| 244      | NW_013185897.1 | 382          | 210772   | 277773    | MARK3. EIF5. LOC106047103 | GWAS        |
| 301      | NW_013185954.1 | 129          | 348330   | 348330    | ADAMTSL1                  | GWAS        |
|          |                |              |          |           |                           |             |
| Scaffold | Scaffold       | Scaffold Num | Start    | End       | Genes                     | Detected by |
| 1        | NW_013185654.1 | 65           | 4317421  | 4317421   | NA                        | Rsb on FLW  |
| 2        | NW_013185655.1 | 45           | 5036899  | 5039122   | HTT                       | Rsb on FLW  |
|          |                |              | 6504697  | 6516128   | ABLIM2                    | Rsb on FLW  |
|          |                |              | 14478731 | 14530100  | SEL1L3                    | Rsb on FLW  |
| 6        | NW_013185659.1 | 88           | 1242836  | 1246345   | LOC106029463              | Rsb on FLW  |
|          |                |              | 8665976  | 8674477   | LOC106029463              | Rsb on FLW  |
| 7        | NW_013185660.1 | 23           | 1056450  | 1159385   | DIRC2                     | Rsb on FLW  |

|                 |                 |                     |              |            |              |                    |
|-----------------|-----------------|---------------------|--------------|------------|--------------|--------------------|
|                 |                 |                     | 971940       | 1039488    | SLC15A2      | Rsb on FLW         |
|                 |                 |                     | 1060969      | 1087402    | HSPBAP1      | Rsb on FLW         |
|                 |                 |                     | 1107225      | 1111134    | LOC106029891 | Rsb on FLW         |
|                 |                 |                     | 1286378      | 1319364    | SEMA5B       | Rsb on FLW         |
| 8               | NW_013185661.1  | 24                  | 2374227      | 2391179    | LOC106030192 | Rsb on FLW         |
|                 |                 |                     | 2475532      | 2571095    | LOC106030195 | Rsb on FLW         |
|                 |                 |                     | 2475532      | 2571095    | LOC106030127 | Rsb on FLW         |
|                 |                 |                     | 2475532      | 2571095    | LOC106030196 | Rsb on FLW         |
|                 |                 |                     | 2475532      | 2571095    | IL6          | Rsb on FLW         |
|                 |                 |                     | 6024649      | 6024649    | GALNT15      | Rsb on FLW         |
| 14              | NW_013185667.1  | 58                  | 7032568      | 7060961    | ESRRG        | Rsb on FLW         |
| 16              | NW_013185669.1  | 20                  | 5227000      | 5229589    | SORCS3       | Rsb on FLW         |
| 22              | NW_013185675.1  | 26                  | 6820283      | 6845885    | CMPK1        | Rsb on FLW         |
|                 |                 |                     | 6972839      | 6984552    | MOB3C        | Rsb on FLW         |
| 58              | NW_013185711.1  | 55                  | 3043972      | 3047147    | MAP7D3       | Rsb on FLW         |
| 61              | NW_013185714.1  | 93                  | 2366851      | 2372113    | AFF2(FMR2)   | Rsb on FLW         |
|                 |                 |                     | 4647533      | 4700148    | GABRE        | Rsb on FLW         |
| 186             | NW_013185839.1  | 107                 | 920242       | 925390     | CCDC37       | Rsb on FLW         |
|                 |                 |                     |              |            |              |                    |
| <b>Scaffold</b> | <b>Scaffold</b> | <b>Scaffold_Num</b> | <b>Start</b> | <b>End</b> | <b>Genes</b> | <b>Detected by</b> |
| 1               | NW_013185654.1  | 65                  | 4039550      | 4045170    | <b>PANK1</b> | Rsb on RLW         |
|                 |                 |                     | 4317421      | 4340217    | LOC106033540 | Rsb on RLW         |
| 2               | NW_013185655.1  | 45                  | 4680402      | 4691368    | TNIP2        | Rsb on RLW         |
|                 |                 |                     | 4824117      | 4857279    | ADD1         | Rsb on RLW         |
|                 |                 |                     | 4857493      | 4883254    | MFSD10       | Rsb on RLW         |
|                 |                 |                     | 4889010      | 4912343    | NOPI4        | Rsb on RLW         |
|                 |                 |                     | 4954016      | 5039122    | HTT          | Rsb on RLW         |
|                 |                 |                     | 6508971      | 6526979    | ABLIM2       | Rsb on RLW         |
| 10              | NW_013185663.1  | 37                  | 4172985      | 4187961    | LOC106030633 | Rsb on RLW         |
| 14              | NW_013185667.1  | 58                  | 7032568      | 7060961    | ESRRG        | Rsb on RLW         |

|                 |                 |                     |              |            |                                                                                                      |                    |
|-----------------|-----------------|---------------------|--------------|------------|------------------------------------------------------------------------------------------------------|--------------------|
| 24              | NW_013185677.1  | 273                 | 1182957      | 1193704    | CLUAP1                                                                                               | Rsb on RLW         |
| 52              | NW_013185705.1  | 81                  | 1241701      | 1242015    | NA                                                                                                   | Rsb on RLW         |
| 59              | NW_013185712.1  | 40                  | 4335439      | 4335487    | NA                                                                                                   | Rsb on RLW         |
| 61              | NW_013185714.1  | 93                  | 4613693      | 4627217    | GABRA3                                                                                               | Rsb on RLW         |
|                 |                 |                     | 4630697      | 4677071    | GABRE                                                                                                | Rsb on RLW         |
| 76              | NW_013185729.1  | 170                 | 2872215      | 2880884    | LOC106039086                                                                                         | Rsb on RLW         |
|                 |                 |                     | 2904318      | 2989485    | ARAP2                                                                                                | Rsb on RLW         |
| 84              | NW_013185737.1  | 158                 | 1123381      | 1129773    | DLG2                                                                                                 | Rsb on RLW         |
|                 |                 |                     | 1129992      | 1135514    | TMEM126A                                                                                             | Rsb on RLW         |
|                 |                 |                     | 1139315      | 1142902    | CCDC89                                                                                               | Rsb on RLW         |
|                 |                 |                     | 1145075      | 1153535    | SYTL2                                                                                                | Rsb on RLW         |
|                 |                 |                     | 1143387      | 1144994    | LOC106039888                                                                                         | Rsb on RLW         |
|                 |                 |                     | 1210621      | 1230110    | CCDC83                                                                                               | Rsb on RLW         |
|                 |                 |                     | 1236257      | 1253816    | PICALM                                                                                               | Rsb on RLW         |
| <b>Scaffold</b> | <b>Scaffold</b> | <b>Scaffold_Num</b> | <b>Start</b> | <b>End</b> | <b>Genes</b>                                                                                         | <b>Detected by</b> |
| 7               | NW_013185660.1  | 23                  | 148419       | 192227     | LOC106029880                                                                                         | hapFLK on TG       |
|                 |                 |                     | 861506       | 930074     | LOC106029886(ARHEGF1). IQCB1. EAF2.<br>LOC106029887                                                  | hapFLK on TG       |
| 8               | NW_013185661.1  | 24                  | 11450064     | 11452098   | OTUD1                                                                                                | hapFLK on TG       |
| 9               | NW_013185662.1  |                     | 2114786      | 7248254    | RIMS1                                                                                                | hapFLK on TG       |
| 15              | NW_013185668.1  | 153                 | 792551       | 797528     | LOC106031663                                                                                         | hapFLK on TG       |
|                 |                 |                     | 805352       | 806966     | ZFP36L1                                                                                              | hapFLK on TG       |
|                 |                 |                     | 808615       | 810911     | LOC106031665                                                                                         | hapFLK on TG       |
|                 |                 |                     | 7699825      | 7713661    | HEATR5A                                                                                              | hapFLK on TG       |
| 19              | NW_013185672.1  | 82                  | 2793424      | 2862658    | NKAIN2. RNF217                                                                                       | hapFLK on TG       |
| 31              | NW_013185684.1  | 368                 | 907029       | 2004731    | SH3BP4(negative regulator on mTOR1 which<br>good for cell growth). Upstream. gene is<br>LOC106034582 | hapFLK on TG       |
| 33              | NW_013185686.1  | 2                   | 89358        | 897517     | LOC106034864. its downstream is SLC35B3                                                              | hapFLK on TG       |
| 58              | NW_013185711.1  | 55                  | 1544350      | 1616383    | LOC106037447                                                                                         | hapFLK on TG       |

|     |                |    |         |         |                                             |              |
|-----|----------------|----|---------|---------|---------------------------------------------|--------------|
|     |                |    | 1911468 | 1938152 | PCDH19                                      | hapFLK on TG |
|     |                |    | 3762923 | 3776908 | HS6ST2                                      | hapFLK on TG |
|     |                |    | 5060563 | 5064141 | HTR2C                                       | hapFLK on TG |
|     |                |    | 5144084 | 5148021 | DLG3                                        | hapFLK on TG |
|     |                |    | 5201835 | 5238320 | TEX11                                       | hapFLK on TG |
|     |                |    | 5238916 | 5241391 | LOC106037398                                | hapFLK on TG |
| 85  | NW_013185738.1 | 47 | 4026163 | 4027278 | SERPINB5                                    | hapFLK on TG |
| 208 | NW_013185861.1 | 52 | 58521   | 71519   | TNS1                                        | hapFLK on TG |
|     |                |    | 564853  | 627818  | LOC106045902. LOC106045903.<br>LOC106045915 | hapFLK on TG |

**Table S4 Customized scaffold number by sorting scaffold length in decreasing order**

| Chr | Sca No.* | RefSeq.Accn    | Chr | Sca No. | RefSeq.Accn    | Chr | Sca No. | RefSeq.Accn    | Chr | Sca No. | RefSeq.Accn    |
|-----|----------|----------------|-----|---------|----------------|-----|---------|----------------|-----|---------|----------------|
| 1   | 65       | NW_013185654.1 | 89  | 135     | NW_013185742.1 | 188 | 489     | NW_013185841.1 | 290 | 279     | NW_013185943.1 |
| 2   | 45       | NW_013185655.1 | 90  | 8       | NW_013185743.1 | 189 | 124     | NW_013185842.1 | 291 | 420     | NW_013185944.1 |
| 3   | 123      | NW_013185656.1 | 92  | 128     | NW_013185745.1 | 190 | 263     | NW_013185843.1 | 292 | 144     | NW_013185945.1 |
| 4   | 105      | NW_013185657.1 | 93  | 72      | NW_013185746.1 | 191 | 285     | NW_013185844.1 | 293 | 364     | NW_013185946.1 |
| 5   | 98       | NW_013185658.1 | 94  | 306     | NW_013185747.1 | 193 | 268     | NW_013185846.1 | 295 | 466     | NW_013185948.1 |
| 6   | 88       | NW_013185659.1 | 95  | 211     | NW_013185748.1 | 194 | 446     | NW_013185847.1 | 296 | 357     | NW_013185949.1 |
| 7   | 23       | NW_013185660.1 | 96  | 15      | NW_013185749.1 | 195 | 223     | NW_013185848.1 | 298 | 350     | NW_013185951.1 |
| 8   | 24       | NW_013185661.1 | 97  | 157     | NW_013185750.1 | 196 | 309     | NW_013185849.1 | 299 | 380     | NW_013185952.1 |
| 9   | 70       | NW_013185662.1 | 98  | 222     | NW_013185751.1 | 198 | 198     | NW_013185851.1 | 300 | 599     | NW_013185953.1 |
| 10  | 37       | NW_013185663.1 | 99  | 154     | NW_013185752.1 | 200 | 409     | NW_013185853.1 | 301 | 129     | NW_013185954.1 |
| 11  | 61       | NW_013185664.1 | 100 | 18      | NW_013185753.1 | 201 | 19      | NW_013185854.1 | 303 | 91      | NW_013185956.1 |
| 12  | 22       | NW_013185665.1 | 101 | 245     | NW_013185754.1 | 202 | 410     | NW_013185855.1 | 305 | 348     | NW_013185958.1 |
| 13  | 252      | NW_013185666.1 | 102 | 21      | NW_013185755.1 | 203 | 482     | NW_013185856.1 | 307 | 465     | NW_013185960.1 |
| 14  | 58       | NW_013185667.1 | 103 | 188     | NW_013185756.1 | 204 | 131     | NW_013185857.1 | 309 | 404     | NW_013185962.1 |
| 15  | 153      | NW_013185668.1 | 104 | 73      | NW_013185757.1 | 205 | 132     | NW_013185858.1 | 310 | 561     | NW_013185963.1 |
| 16  | 20       | NW_013185669.1 | 105 | 4       | NW_013185758.1 | 206 | 237     | NW_013185859.1 | 311 | 289     | NW_013185964.1 |
| 17  | 74       | NW_013185670.1 | 106 | 145     | NW_013185759.1 | 207 | 301     | NW_013185860.1 | 312 | 499     | NW_013185965.1 |
| 18  | 230      | NW_013185671.1 | 107 | 33      | NW_013185760.1 | 208 | 52      | NW_013185861.1 | 313 | 427     | NW_013185966.1 |
| 19  | 82       | NW_013185672.1 | 108 | 371     | NW_013185761.1 | 210 | 171     | NW_013185863.1 | 314 | 438     | NW_013185967.1 |
| 20  | 66       | NW_013185673.1 | 109 | 281     | NW_013185762.1 | 211 | 256     | NW_013185864.1 | 315 | 325     | NW_013185968.1 |
| 21  | 96       | NW_013185674.1 | 110 | 194     | NW_013185763.1 | 212 | 277     | NW_013185865.1 | 316 | 11      | NW_013185969.1 |
| 22  | 26       | NW_013185675.1 | 111 | 84      | NW_013185764.1 | 213 | 159     | NW_013185866.1 | 317 | 3       | NW_013185970.1 |
| 23  | 274      | NW_013185676.1 | 112 | 137     | NW_013185765.1 | 214 | 249     | NW_013185867.1 | 318 | 412     | NW_013185971.1 |
| 24  | 273      | NW_013185677.1 | 113 | 426     | NW_013185766.1 | 215 | 260     | NW_013185868.1 | 319 | 352     | NW_013185972.1 |
| 25  | 86       | NW_013185678.1 | 114 | 39      | NW_013185767.1 | 217 | 17      | NW_013185870.1 | 320 | 750     | NW_013185973.1 |
| 26  | 147      | NW_013185679.1 | 115 | 162     | NW_013185768.1 | 218 | 473     | NW_013185871.1 | 321 | 449     | NW_013185974.1 |
| 27  | 14       | NW_013185680.1 | 116 | 56      | NW_013185769.1 | 219 | 127     | NW_013185872.1 | 322 | 331     | NW_013185975.1 |
| 28  | 121      | NW_013185681.1 | 117 | 287     | NW_013185770.1 | 220 | 307     | NW_013185873.1 | 323 | 113     | NW_013185976.1 |

|    |     |                |     |     |                |     |     |                |     |     |                |
|----|-----|----------------|-----|-----|----------------|-----|-----|----------------|-----|-----|----------------|
| 29 | 44  | NW_013185682.1 | 118 | 292 | NW_013185771.1 | 221 | 146 | NW_013185874.1 | 324 | 374 | NW_013185977.1 |
| 30 | 253 | NW_013185683.1 | 119 | 204 | NW_013185772.1 | 222 | 13  | NW_013185875.1 | 325 | 77  | NW_013185978.1 |
| 31 | 368 | NW_013185684.1 | 120 | 42  | NW_013185773.1 | 224 | 95  | NW_013185877.1 | 326 | 501 | NW_013185979.1 |
| 32 | 141 | NW_013185685.1 | 121 | 108 | NW_013185774.1 | 225 | 136 | NW_013185878.1 | 328 | 664 | NW_013185981.1 |
| 33 | 2   | NW_013185686.1 | 122 | 240 | NW_013185775.1 | 226 | 308 | NW_013185879.1 | 329 | 487 | NW_013185982.1 |
| 34 | 57  | NW_013185687.1 | 124 | 25  | NW_013185777.1 | 227 | 151 | NW_013185880.1 | 333 | 621 | NW_013185986.1 |
| 35 | 6   | NW_013185688.1 | 125 | 329 | NW_013185778.1 | 229 | 569 | NW_013185882.1 | 334 | 612 | NW_013185987.1 |
| 36 | 68  | NW_013185689.1 | 126 | 49  | NW_013185779.1 | 231 | 386 | NW_013185884.1 | 336 | 666 | NW_013185989.1 |
| 37 | 12  | NW_013185690.1 | 127 | 326 | NW_013185780.1 | 232 | 299 | NW_013185885.1 | 337 | 477 | NW_013185990.1 |
| 38 | 46  | NW_013185691.1 | 128 | 109 | NW_013185781.1 | 233 | 92  | NW_013185886.1 | 338 | 294 | NW_013185991.1 |
| 39 | 83  | NW_013185692.1 | 129 | 313 | NW_013185782.1 | 234 | 205 | NW_013185887.1 | 339 | 417 | NW_013185992.1 |
| 40 | 118 | NW_013185693.1 | 130 | 48  | NW_013185783.1 | 235 | 358 | NW_013185888.1 | 340 | 548 | NW_013185993.1 |
| 41 | 7   | NW_013185694.1 | 132 | 213 | NW_013185785.1 | 236 | 229 | NW_013185889.1 | 341 | 234 | NW_013185994.1 |
| 42 | 97  | NW_013185695.1 | 133 | 369 | NW_013185786.1 | 237 | 102 | NW_013185890.1 | 342 | 457 | NW_013185995.1 |
| 43 | 163 | NW_013185696.1 | 134 | 168 | NW_013185787.1 | 238 | 67  | NW_013185891.1 | 343 | 592 | NW_013185996.1 |
| 44 | 173 | NW_013185697.1 | 135 | 323 | NW_013185788.1 | 239 | 452 | NW_013185892.1 | 344 | 448 | NW_013185997.1 |
| 45 | 138 | NW_013185698.1 | 136 | 181 | NW_013185789.1 | 240 | 414 | NW_013185893.1 | 347 | 196 | NW_013186000.1 |
| 46 | 286 | NW_013185699.1 | 138 | 354 | NW_013185791.1 | 241 | 160 | NW_013185894.1 | 348 | 444 | NW_013186001.1 |
| 47 | 51  | NW_013185700.1 | 139 | 28  | NW_013185792.1 | 242 | 334 | NW_013185895.1 | 349 | 455 | NW_013186002.1 |
| 48 | 94  | NW_013185701.1 | 140 | 356 | NW_013185793.1 | 243 | 267 | NW_013185896.1 | 350 | 360 | NW_013186003.1 |
| 49 | 53  | NW_013185702.1 | 141 | 140 | NW_013185794.1 | 244 | 382 | NW_013185897.1 | 351 | 156 | NW_013186004.1 |
| 50 | 5   | NW_013185703.1 | 142 | 89  | NW_013185795.1 | 245 | 463 | NW_013185898.1 | 354 | 701 | NW_013186007.1 |
| 51 | 193 | NW_013185704.1 | 143 | 41  | NW_013185796.1 | 246 | 265 | NW_013185899.1 | 355 | 675 | NW_013186008.1 |
| 52 | 81  | NW_013185705.1 | 144 | 180 | NW_013185797.1 | 247 | 43  | NW_013185900.1 | 357 | 391 | NW_013186010.1 |
| 53 | 164 | NW_013185706.1 | 145 | 276 | NW_013185798.1 | 248 | 111 | NW_013185901.1 | 360 | 502 | NW_013186013.1 |
| 54 | 133 | NW_013185707.1 | 146 | 304 | NW_013185799.1 | 249 | 288 | NW_013185902.1 | 361 | 282 | NW_013186014.1 |
| 55 | 87  | NW_013185708.1 | 147 | 381 | NW_013185800.1 | 250 | 134 | NW_013185903.1 | 362 | 416 | NW_013186015.1 |
| 56 | 155 | NW_013185709.1 | 148 | 215 | NW_013185801.1 | 251 | 423 | NW_013185904.1 | 363 | 537 | NW_013186016.1 |
| 57 | 78  | NW_013185710.1 | 149 | 303 | NW_013185802.1 | 253 | 411 | NW_013185906.1 | 364 | 142 | NW_013186017.1 |
| 58 | 55  | NW_013185711.1 | 150 | 388 | NW_013185803.1 | 254 | 346 | NW_013185907.1 | 365 | 670 | NW_013186018.1 |

|    |     |                |     |     |                |     |     |                |     |     |                |
|----|-----|----------------|-----|-----|----------------|-----|-----|----------------|-----|-----|----------------|
| 59 | 40  | NW_013185712.1 | 152 | 165 | NW_013185805.1 | 255 | 10  | NW_013185908.1 | 366 | 519 | NW_013186019.1 |
| 60 | 167 | NW_013185713.1 | 155 | 359 | NW_013185808.1 | 258 | 80  | NW_013185911.1 | 368 | 647 | NW_013186021.1 |
| 61 | 93  | NW_013185714.1 | 157 | 218 | NW_013185810.1 | 259 | 242 | NW_013185912.1 | 369 | 321 | NW_013186022.1 |
| 62 | 35  | NW_013185715.1 | 158 | 115 | NW_013185811.1 | 260 | 79  | NW_013185913.1 | 375 | 488 | NW_013186028.1 |
| 63 | 225 | NW_013185716.1 | 159 | 90  | NW_013185812.1 | 261 | 283 | NW_013185914.1 | 377 | 564 | NW_013186030.1 |
| 64 | 38  | NW_013185717.1 | 160 | 269 | NW_013185813.1 | 262 | 394 | NW_013185915.1 | 379 | 435 | NW_013186032.1 |
| 65 | 275 | NW_013185718.1 | 161 | 125 | NW_013185814.1 | 263 | 187 | NW_013185916.1 | 382 | 611 | NW_013186035.1 |
| 66 | 117 | NW_013185719.1 | 162 | 209 | NW_013185815.1 | 264 | 182 | NW_013185917.1 | 384 | 349 | NW_013186037.1 |
| 67 | 85  | NW_013185720.1 | 163 | 224 | NW_013185816.1 | 266 | 302 | NW_013185919.1 | 386 | 500 | NW_013186039.1 |
| 68 | 64  | NW_013185721.1 | 165 | 126 | NW_013185818.1 | 267 | 333 | NW_013185920.1 | 388 | 312 | NW_013186041.1 |
| 69 | 100 | NW_013185722.1 | 166 | 34  | NW_013185819.1 | 268 | 177 | NW_013185921.1 | 394 | 257 | NW_013186047.1 |
| 70 | 231 | NW_013185723.1 | 167 | 54  | NW_013185820.1 | 269 | 207 | NW_013185922.1 | 395 | 560 | NW_013186048.1 |
| 71 | 322 | NW_013185724.1 | 168 | 112 | NW_013185821.1 | 270 | 474 | NW_013185923.1 | 396 | 347 | NW_013186049.1 |
| 72 | 36  | NW_013185725.1 | 169 | 174 | NW_013185822.1 | 271 | 75  | NW_013185924.1 | 399 | 872 | NW_013186052.1 |
| 73 | 99  | NW_013185726.1 | 170 | 387 | NW_013185823.1 | 272 | 424 | NW_013185925.1 | 400 | 241 | NW_013186053.1 |
| 74 | 114 | NW_013185727.1 | 172 | 293 | NW_013185825.1 | 273 | 246 | NW_013185926.1 | 401 | 610 | NW_013186054.1 |
| 75 | 63  | NW_013185728.1 | 173 | 27  | NW_013185826.1 | 274 | 166 | NW_013185927.1 | 402 | 625 | NW_013186055.1 |
| 76 | 170 | NW_013185729.1 | 174 | 258 | NW_013185827.1 | 275 | 591 | NW_013185928.1 | 403 | 515 | NW_013186056.1 |
| 77 | 186 | NW_013185730.1 | 175 | 367 | NW_013185828.1 | 276 | 255 | NW_013185929.1 | 405 | 513 | NW_013186058.1 |
| 78 | 319 | NW_013185731.1 | 176 | 361 | NW_013185829.1 | 277 | 598 | NW_013185930.1 | 406 | 517 | NW_013186059.1 |
| 79 | 195 | NW_013185732.1 | 177 | 60  | NW_013185830.1 | 278 | 393 | NW_013185931.1 | 410 | 784 | NW_013186063.1 |
| 80 | 143 | NW_013185733.1 | 178 | 219 | NW_013185831.1 | 280 | 280 | NW_013185933.1 | 411 | 373 | NW_013186064.1 |
| 81 | 221 | NW_013185734.1 | 179 | 110 | NW_013185832.1 | 281 | 450 | NW_013185934.1 | 415 | 650 | NW_013186068.1 |
| 82 | 103 | NW_013185735.1 | 180 | 339 | NW_013185833.1 | 283 | 529 | NW_013185936.1 | 424 | 441 | NW_013186077.1 |
| 83 | 353 | NW_013185736.1 | 181 | 59  | NW_013185834.1 | 284 | 459 | NW_013185937.1 | 429 | 550 | NW_013186082.1 |
| 84 | 158 | NW_013185737.1 | 182 | 101 | NW_013185835.1 | 285 | 442 | NW_013185938.1 | 430 | 418 | NW_013186083.1 |
| 85 | 47  | NW_013185738.1 | 183 | 236 | NW_013185836.1 | 286 | 243 | NW_013185939.1 | 432 | 315 | NW_013186085.1 |
| 86 | 104 | NW_013185739.1 | 184 | 254 | NW_013185837.1 | 287 | 407 | NW_013185940.1 | 434 | 568 | NW_013186087.1 |
| 87 | 30  | NW_013185740.1 | 185 | 201 | NW_013185838.1 | 288 | 628 | NW_013185941.1 | 449 | 577 | NW_013186102.1 |
| 88 | 247 | NW_013185741.1 | 186 | 107 | NW_013185839.1 | 289 | 351 | NW_013185942.1 | 457 | 451 | NW_013186110.1 |

Table S5 Expression levels of APOB and TGH at four timepoints

| <b>TimePoints</b> | <b>Gene</b> | <b>RQ</b> | <b>TimePoints</b> | <b>Gene</b> | <b>RQ</b> |
|-------------------|-------------|-----------|-------------------|-------------|-----------|
| OF-0              | APOB        | 2,948     | OF-0              | TGH         | 0,474733  |
| OF-0              | APOB        | 1,828     | OF-0              | TGH         | 0,260882  |
| OF-0              | APOB        | 2,99      | OF-0              | TGH         | 0,523078  |
| OF-0              | APOB        | 1,899     | OF-0              | TGH         | 0,360069  |
| OF-0              | APOB        | 2,6       | OF-0              | TGH         | 0,213298  |
| OF-0              | APOB        | 2,065     | OF-0              | TGH         | 0,279072  |
| OF-7              | APOB        | 0,612     | OF-7              | TGH         | 0,153637  |
| OF-7              | APOB        | 2,157     | OF-7              | TGH         | 0,414028  |
| OF-7              | APOB        | 2,579     | OF-7              | TGH         | 0,087204  |
| OF-7              | APOB        | 1,753     | OF-7              | TGH         | 0,157056  |
| OF-7              | APOB        | 1,226     | OF-7              | TGH         | 0,244331  |
| OF-7              | APOB        | 2,111     | OF-7              | TGH         | 0,071192  |
| OF-14             | APOB        | 1,093     | OF-14             | TGH         | 0,016346  |
| OF-14             | APOB        | 1,448     | OF-14             | TGH         | 0,13922   |
| OF-14             | APOB        | 0,757     | OF-14             | TGH         | 0,04159   |
| OF-14             | APOB        | 0,591     | OF-14             | TGH         | 0,077713  |
| OF-14             | APOB        | NA        | OF-14             | TGH         | 0,080841  |
| OF-14             | APOB        | NA        | OF-14             | TGH         | 0,025251  |
| OF-20             | APOB        | NA        | OF-21             | TGH         | 0,039869  |
| OF-21             | APOB        | 1,1654    | OF-21             | TGH         | 0,017776  |
| OF-21             | APOB        | 0,9734    | OF-21             | TGH         | 0,016736  |
| OF-21             | APOB        | 0,8415    | OF-21             | TGH         | 0,017808  |
| OF-21             | APOB        | 0,9969    | OF-21             | TGH         | 0,005536  |
| OF-21             | APOB        | 0,732     | OF-21             | TGH         | 0,051428  |

Notes: cell area was not provided here as there was too much data which would make it difficult to read.



**Table S6 Phenotypes in each category groups with extreme high and low values**

| <b>Phenotypes<sup>¶</sup></b>  | <b>High-FLW</b>  | <b>Low-FLW</b>   | <b>High-RLW</b>  | <b>Low-RLW</b>   | <b>HTG</b>       | <b>LTG</b>      | <b>Before</b> | <b>After</b>     |
|--------------------------------|------------------|------------------|------------------|------------------|------------------|-----------------|---------------|------------------|
| <b>Groups*<br/>Sample Size</b> | 25               | 24               | 22               | 21               | 14               | 10              | 15            | 305              |
| <b>Prewt (g)</b>               | 4998.12 ± 536.47 | 4780.24 ± 384.95 | 4559.05 ± 385.58 | 4936.67 ± 406.09 | 4857.5 ± 526.64  | 4704.5 ± 509.75 | -             | 4788.11 ± 436.6  |
| <b>Pstwt (g)</b>               | 8444.71 ± 623.87 | 7532.19 ± 417.89 | 7742.71 ± 515.33 | 7666.83 ± 489.28 | 7844 ± 993.68    | 7541.9 ± 702.97 | -             | 7885.76 ± 588.6  |
| <b>OFG (g)</b>                 | 3446.58 ± 347.31 | 2751.95 ± 337.1  | 3183.67 ± 453.29 | 2730.17 ± 303.36 | 2986.5 ± 654.91  | 2837.4 ± 570.18 | -             | 3097.65 ± 434.23 |
| <b>FLW (g)</b>                 | 1504.88 ± 98.12  | 757.9 ± 93.88    | 1449.86 ± 135.75 | 751.03 ± 102.39  | 1178.65 ± 266.87 | 984.15 ± 141.78 | -             | 1127.45 ± 206.65 |
| <b>ABW (g)</b>                 | 533.94 ± 66.84   | 467.79 ± 100.47  | 466.19 ± 76.61   | 462.39 ± 104.4   | 518.45 ± 89.21   | 417 ± 107.89    | -             | 499.86 ± 83.73   |
| <b>RLW</b>                     | 0.18 ± 0.01      | 0.1 ± 0.01       | 0.19 ± 0.01      | 0.1 ± 0.01       | 0.15 ± 0.03      | 0.13 ± 0.02     | -             | 0.14 ± 0.02      |
| <b>AST (U/L)</b>               | 315.85 ± 192.22  | 172.29 ± 198.7   | 369.11 ± 349.37  | 193.48 ± 214.64  | 285 ± 300.5      | 99.81 ± 106.41  | 175.1 ± 116.2 | 321.0 ± 574.1    |
| <b>ALT (U/L)</b>               | 73.71 ± 31.98    | 58.64 ± 44.88    | 80.76 ± 63.21    | 64.83 ± 49.1     | 101.81 ± 91.46   | 25.34 ± 21.13   | 86.0 ± 64.6   | 73.0 ± 79.0      |
| <b>TBIL (µmol/L)</b>           | 10.96 ± 3.41     | 8.63 ± 5.66      | 10.54 ± 3.07     | 9.05 ± 5.88      | 9.14 ± 4.25      | 3.89 ± 2.25     | 113.5 ± 103.2 | 8.0 ± 4.3        |
| <b>DBIL (µmol/L)</b>           | 7.62 ± 2.47      | 3.84 ± 4.14      | 7.62 ± 2.17      | 3.95 ± 4.27      | 6.4 ± 3.49       | 2.36 ± 1.82     | 14.3 ± 13.5   | 4.5 ± 3.3        |
| <b>TC (mmol/L)</b>             | 8.64 ± 1.79      | 8.45 ± 3.08      | 8.56 ± 2.04      | 8.33 ± 3.17      | 10.2 ± 2.3       | 3.51 ± 1.57     | 5.8 ± 2.4     | 8.1 ± 2.6        |
| <b>TG (mmol/L)</b>             | 6.89 ± 3.11      | 5.27 ± 2.62      | 7.75 ± 3.25      | 5.48 ± 2.85      | 23.55 ± 6.06     | 2.07 ± 0.13     | 3.3 ± 1.6     | 6.2 ± 2.6        |
| <b>HDL (mmol/L)</b>            | 5.2 ± 1.66       | 5.7 ± 1.85       | 5.05 ± 1.51      | 5.53 ± 2         | 3.16 ± 1.42      | 2.51 ± 1.08     | 2.0 ± 0.3     | 5.4 ± 1.7        |
| <b>TBA (µmol/L)</b>            | 100.36 ± 38.41   | 61.14 ± 27.51    | 99.15 ± 39.22    | 65.4 ± 33.69     | 80.32 ± 22.56    | 28.03 ± 14.79   | 21.9 ± 14.9   | 76.6 ± 32.1      |
| <b>GLU (mmol/L)</b>            | 19.42 ± 11.53    | 24.62 ± 15.27    | 16.78 ± 9.17     | 25.04 ± 15.59    | 19.82 ± 10.5     | 18.78 ± 15.2    | 12.7 ± 4.2    | 17.5 ± 10.6      |
| <b>LDL (mmol/L)</b>            | 3.45 ± 0.9       | 3.29 ± 1.54      | 3.53 ± 1.12      | 3.29 ± 1.56      | 4.36 ± 1.17      | 1.16 ± 0.53     | 1.0 ± 0.2     | 3.2 ± 1.3        |
| <b>VLDL (mmol/L)</b>           | 0.6 ± 0.47       | 0.52 ± 0.41      | 0.69 ± 0.48      | 0.55 ± 0.42      | 1.19 ± 0.61      | 0.36 ± 0.19     | 1.1 ± 0.7     | 0.5 ± 0.4        |
| <b>PIII (µg/L)</b>             | 32.25 ± 14.89    | 30.35 ± 9.26     | 28.36 ± 6.73     | 30.11 ± 9.76     | 169.01 ± 287.52  | 34.66 ± 8.24    | 37.8 ± 5.3    | 30.0 ± 8.3       |
| <b>HA (ng/ml)</b>              | 396.84 ± 136.08  | 382.54 ± 180.91  | 357.47 ± 176.95  | 390.06 ± 187.37  | 593.71 ± 160.81  | 408.5 ± 154.12  | 264.5 ± 113.0 | 342.2 ± 161.9    |
| <b>RAA</b>                     | 4.19 ± 1.23      | 2.66 ± 0.84      | 4.27 ± 1.39      | 2.71 ± 0.91      | 3.38 ± 1.94      | 3.41 ± 1.16     | 2.55 ± 1.22   | 3.55 ± 1.67      |

\* Group names of High-/Low-FLW. High-/Low-RLW. H/LTG. Before and After means extremely high/low fatty liver weight (FLW), extremely high/low ratio of FLW to body weight after overfeeding (RLW), extremely high/low lipid levels (TG shown), phenotypes before and after overfeeding. Prewt, Pstwt, OFG, FLW, ABW and RLW were not measured because these 15 geese were excluded due to technical reasons. ¶ Names of phenotypes were explained well in main document.

**Table S7 Associations between variants from 7 genes with highest signals and all phenotypes**

| Chr* | Region          | Gene    | Prewt | Pstwt | OFG | FLW | ABW | RLW | AST | ALT | TBIL | DBIL | TC | TG | HDL | TBA | GLU | LDL | VLDL | PIII | HA | RSLT |
|------|-----------------|---------|-------|-------|-----|-----|-----|-----|-----|-----|------|------|----|----|-----|-----|-----|-----|------|------|----|------|
| 14   | 7032880-7060961 | ESRRG   | 0     | 0     | 0   | 1   | 1   | 16  | 0   | 0   | 0    | 0    | 0  | 6  | 0   | 0   | 0   | 0   | 0    | 7    | 0  | 0    |
| 61   | 4647533-4700148 | GABRE   | 0     | 0     | 0   | 0   | 0   | 0   | 0   | 0   | 0    | 0    | 66 | 37 | 18  | 10  | 27  | 40  | 8    | 0    | 0  | 35   |
| 76   | 2904365-2989485 | ARAP2   | 19    | 19    | 12  | 183 | 0   | 101 | 17  | 5   | 0    | 74   | 2  | 1  | 1   | 0   | 59  | 6   | 10   | 0    | 4  | 47   |
| 8    | 2475532-2570987 | IL6     | 1     | 1     | 1   | 11  | 0   | 17  | 1   | 1   | 0    | 4    | 18 | 6  | 6   | 3   | 25  | 77  | 1    | 33   | 1  | 5    |
| 148  | 1064792-1096469 | IQCJ    | 0     | 1     | 1   | 5   | 0   | 5   | 3   | 1   | 1    | 1    | 0  | 1  | 0   | 1   | 0   | 1   | 2    | 0    | 0  | 0    |
| 7    | 864602-895500   | ARHGEF1 | 87    | 0     | 0   | 0   | 0   | 0   | 0   | 0   | 0    | 0    | 27 | 2  | 0   | 13  | 0   | 67  | 0    | 20   | 0  | 0    |
| 15   | 790000-80000    | ZFP36L1 | 7     | 7     | 7   | 0   | 7   | 7   | 7   | 7   | 7    | 0    | 0  | 0  | 7   | 7   | 0   | 0   | 0    | 7    | 7  | 7    |
| 208  | 66395-66395     | TNS1    | 0     | 1     | 1   | 0   | 0   | 1   | 0   | 0   | 1    | 1    | 0  | 0  | 0   | 1   | 0   | 0   | 1    | 1    | 0  | 0    |

\* Scaffold number was defined in our study for the purpose to make some Manhattan plots more readable and details could be found in Table S6.

**Table S8 Gene expression analysis from public RNA-Seq datasets**

| Gene    | baseMean | baseMean_<br>control_Sa<br>mple_Land<br>es_C0 | baseMean_<br>case_Samp<br>le_Landes_<br>C20 | foldChange | log2Fold<br>Change | pval | padj | fpkm_S<br>ample_<br>Landes_<br>C0_1 | fpkm_S<br>ample_<br>Landes_<br>C0_2 | fpkm_S<br>ample_<br>Landes_<br>C0_3 | fpkm_S<br>ample_<br>Landes_<br>C20_1 | fpkm_S<br>ample_<br>Landes_<br>C20_2 | fpkm_S<br>ample_<br>Landes_<br>C20_3 |
|---------|----------|-----------------------------------------------|---------------------------------------------|------------|--------------------|------|------|-------------------------------------|-------------------------------------|-------------------------------------|--------------------------------------|--------------------------------------|--------------------------------------|
| ABLIM2  | 193.17   | 253.61                                        | 132.74                                      | 0.52       | -0.93              | 0.00 | 0.02 | 3.04                                | 2.30                                | 2.69                                | 1.18                                 | 2.53                                 | 2.22                                 |
| AFF2    | 307.95   | 300.28                                        | 315.61                                      | 1.05       | 0.07               | 0.85 | 0.98 | 0.99                                | 1.52                                | 1.38                                | 1.52                                 | 2.11                                 | 2.13                                 |
| ARAP2   | 41.25    | 38.01                                         | 44.48                                       | 1.17       | 0.23               | 0.60 | 0.83 | 0.20                                | 0.36                                | 0.23                                | 0.18                                 | 0.53                                 | 0.64                                 |
| BAZ1A   | 818.25   | 639.49                                        | 997.01                                      | 1.56       | 0.64               | 0.02 | 0.10 | 4.90                                | 4.80                                | 4.58                                | 11.04                                | 9.74                                 | 10.47                                |
| CCDC37  | 31.02    | 31.61                                         | 30.43                                       | 0.96       | -0.05              | 1.00 | 1.00 | 0.51                                | 0.36                                | 0.24                                | 0.44                                 | 0.30                                 | 0.64                                 |
| CCDC83  | 1.70     | 0.00                                          | 3.40                                        | Inf        | Inf                | 0.08 | 0.25 | 0.00                                | 0.00                                | 0.00                                | 0.12                                 | 0.00                                 | 0.02                                 |
| CCDC89  | 3.20     | 5.04                                          | 1.35                                        | 0.27       | -1.90              | 0.23 | 0.50 | 0.04                                | 0.06                                | 0.11                                | 0.00                                 | 0.00                                 | 0.07                                 |
| CLUAP1  | 123.38   | 103.54                                        | 143.22                                      | 1.38       | 0.47               | 0.17 | 0.41 | 0.46                                | 0.90                                | 0.72                                | 1.25                                 | 0.97                                 | 1.79                                 |
| CMPK1   | 594.21   | 562.76                                        | 625.65                                      | 1.11       | 0.15               | 0.68 | 0.88 | 9.34                                | 10.54                               | 10.89                               | 16.37                                | 16.75                                | 15.16                                |
| DIRC2   | 177.05   | 184.07                                        | 170.02                                      | 0.92       | -0.11              | 0.64 | 0.86 | 3.61                                | 3.23                                | 3.05                                | 4.48                                 | 3.92                                 | 4.16                                 |
| DLG2    | 83.04    | 67.98                                         | 98.10                                       | 1.44       | 0.53               | 0.13 | 0.34 | 0.27                                | 0.34                                | 0.31                                | 0.55                                 | 0.62                                 | 0.76                                 |
| EAF2    | 439.98   | 297.81                                        | 582.15                                      | 1.95       | 0.97               | 0.26 | 0.53 | 5.96                                | 22.18                               | 4.84                                | 38.38                                | 32.39                                | 20.19                                |
| EIF5    | 5394.71  | 6414.79                                       | 4374.64                                     | 0.68       | -0.55              | 0.03 | 0.12 | 161.66                              | 132.39                              | 144.80                              | 135.88                               | 149.43                               | 133.91                               |
| ESRRG   | 200.73   | 229.53                                        | 171.92                                      | 0.75       | -0.42              | 0.11 | 0.31 | 4.01                                | 4.95                                | 2.83                                | 3.57                                 | 4.56                                 | 3.63                                 |
| FITM2   | 201.47   | 132.63                                        | 270.32                                      | 2.04       | 1.03               | 0.01 | 0.06 | 1.46                                | 1.42                                | 1.10                                | 3.95                                 | 4.56                                 | 2.76                                 |
| GABRA3  | 0.72     | 1.24                                          | 0.20                                        | 0.16       | -2.65              | 0.69 | 0.89 | 0.00                                | 0.00                                | 0.02                                | 0.00                                 | 0.00                                 | 0.01                                 |
| GABRE   | 0.00     | 0.00                                          | 0.00                                        |            |                    |      |      | 0.00                                | 0.00                                | 0.00                                | 0.00                                 | 0.00                                 | 0.00                                 |
| GALNT15 | 64.98    | 36.53                                         | 93.42                                       | 2.56       | 1.35               | 0.00 | 0.00 | 0.17                                | 0.16                                | 0.25                                | 0.76                                 | 0.63                                 | 1.13                                 |
| HEATR5A | 331.78   | 256.97                                        | 406.58                                      | 1.58       | 0.66               | 0.03 | 0.12 | 1.60                                | 1.60                                | 1.32                                | 2.92                                 | 4.00                                 | 3.28                                 |
| HSPBAP1 | 49.81    | 51.56                                         | 48.06                                       | 0.93       | -0.10              | 0.89 | 1.00 | 1.37                                | 0.93                                | 0.83                                | 1.18                                 | 1.34                                 | 1.61                                 |
| HTT     | 552.12   | 712.58                                        | 391.67                                      | 0.55       | -0.86              | 0.00 | 0.02 | 3.76                                | 3.58                                | 3.37                                | 2.20                                 | 2.89                                 | 3.20                                 |
| IL16    | 112.48   | 120.23                                        | 104.74                                      | 0.87       | -0.20              | 0.76 | 0.94 | 1.11                                | 1.25                                | 0.95                                | 0.81                                 | 1.24                                 | 2.36                                 |
| IL1B    | 17.07    | 3.15                                          | 31.00                                       | 9.86       | 3.30               | 0.00 | 0.00 | 0.05                                | 0.09                                | 0.09                                | 0.94                                 | 0.91                                 | 1.19                                 |
| IL6     | 0.63     | 0.00                                          | 1.27                                        | Inf        | Inf                | 0.52 | 0.77 | 0.00                                | 0.00                                | 0.00                                | 0.14                                 | 0.25                                 | 0.00                                 |
| IQCB1   | 195.06   | 217.20                                        | 172.93                                      | 0.80       | -0.33              | 0.24 | 0.50 | 1.82                                | 1.92                                | 1.39                                | 1.83                                 | 2.06                                 | 2.06                                 |
| IQCJ    | 2.76     | 0.36                                          | 5.16                                        | 14.42      | 3.85               | 0.04 | 0.16 | 0.00                                | 0.00                                | 0.00                                | 0.03                                 | 0.01                                 | 0.06                                 |

|                      |          |         |          |      |       |      |      |        |        |        |        |        |        |
|----------------------|----------|---------|----------|------|-------|------|------|--------|--------|--------|--------|--------|--------|
| LOC106030633         | 0.00     | 0.00    | 0.00     |      |       |      |      | 0.00   | 0.00   | 0.00   | 0.00   | 0.00   | 0.00   |
| LOC106033540         | 1.32     | 0.36    | 2.28     | 6.37 | 2.67  | 0.40 | 0.68 | 0.00   | 0.05   | 0.00   | 0.13   | 0.11   | 0.09   |
| LOC106039033(Cyp7a1) | 52.64    | 64.53   | 40.75    | 0.63 | -0.66 | 0.31 | 0.58 | 2.68   | 2.04   | 1.22   | 0.48   | 2.44   | 2.32   |
| MAP7D3               | 456.21   | 407.79  | 504.63   | 1.24 | 0.31  | 0.23 | 0.49 | 3.67   | 3.14   | 2.83   | 5.12   | 4.96   | 7.11   |
| MARK3                | 445.72   | 440.43  | 451.01   | 1.02 | 0.03  | 0.93 | 1.00 | 3.13   | 3.10   | 3.40   | 4.10   | 4.41   | 5.20   |
| MDGA2                | 28.46    | 25.66   | 31.27    | 1.22 | 0.29  | 0.53 | 0.78 | 0.24   | 0.21   | 0.43   | 0.45   | 0.64   | 0.57   |
| MOB2                 | 234.35   | 280.87  | 187.83   | 0.67 | -0.58 | 0.05 | 0.17 | 10.52  | 11.01  | 8.51   | 9.14   | 9.00   | 10.82  |
| MOB3C                | 81.62    | 62.10   | 101.15   | 1.63 | 0.70  | 0.04 | 0.15 | 0.42   | 0.55   | 0.54   | 0.86   | 1.30   | 1.58   |
| MYT1L                | 0.15     | 0.00    | 0.30     | Inf  | Inf   | 1.00 | 1.00 | 0.00   | 0.00   | 0.00   | 0.00   | 0.00   | 0.00   |
| NOP14                | 376.22   | 356.98  | 395.45   | 1.11 | 0.15  | 0.69 | 0.89 | 4.43   | 4.62   | 4.43   | 7.44   | 6.37   | 6.75   |
| NR1H4                | 673.95   | 1013.70 | 334.20   | 0.33 | -1.60 | 0.00 | 0.00 | 17.45  | 22.23  | 17.30  | 6.95   | 7.95   | 12.10  |
| OSBPL5               | 143.02   | 101.82  | 184.21   | 1.81 | 0.86  | 0.01 | 0.06 | 0.99   | 1.43   | 0.89   | 2.30   | 3.30   | 2.60   |
| PANK1                | 2315.85  | 2573.21 | 2058.49  | 0.80 | -0.32 | 0.17 | 0.40 | 63.60  | 65.74  | 43.26  | 70.90  | 73.08  | 48.74  |
| PICALM               | 331.60   | 298.04  | 365.16   | 1.23 | 0.29  | 0.34 | 0.62 | 4.98   | 6.17   | 4.59   | 8.14   | 8.92   | 9.85   |
| PLIN2                | 15847.47 | 9379.23 | 22315.70 | 2.38 | 1.25  | 0.00 | 0.00 | 134.95 | 111.90 | 148.78 | 515.49 | 439.89 | 365.81 |
| SEL1L3               | 342.79   | 442.25  | 243.32   | 0.55 | -0.86 | 0.02 | 0.11 | 4.21   | 7.33   | 4.59   | 2.78   | 5.02   | 4.93   |
| SEMA5B               | 200.61   | 197.63  | 203.60   | 1.03 | 0.04  | 0.89 | 1.00 | 0.87   | 0.86   | 0.60   | 0.82   | 1.40   | 1.27   |
| SLC15A2              | 1.41     | 2.01    | 0.80     | 0.40 | -1.33 | 0.65 | 0.87 | 0.01   | 0.01   | 0.01   | 0.00   | 0.02   | 0.01   |
| SLC7A3               | 252.61   | 146.09  | 359.14   | 2.46 | 1.30  | 0.01 | 0.05 | 2.91   | 4.69   | 2.28   | 14.09  | 8.38   | 13.38  |
| SOD3                 | 198.6    | 82.05   | 315.15   | 3.84 | 1.94  | 0.01 | 0.04 | 2.17   | 2.84   | 4.68   | 24.37  | 8.11   | 24.52  |
| SORCS3               | 119.72   | 109.85  | 129.59   | 1.18 | 0.24  | 0.58 | 0.82 | 0.55   | 0.96   | 0.94   | 1.47   | 1.12   | 1.29   |
| SYTL2                | 221.18   | 339.51  | 102.86   | 0.30 | -1.72 | 0.00 | 0.00 | 1.46   | 1.11   | 1.61   | 0.35   | 0.64   | 0.84   |
| TMEM126A             | 172.27   | 185.42  | 159.12   | 0.86 | -0.22 | 0.39 | 0.67 | 14.57  | 14.69  | 13.42  | 20.09  | 11.15  | 16.96  |
| TNIP2                | 108.57   | 123.36  | 93.78    | 0.76 | -0.40 | 0.24 | 0.50 | 0.86   | 1.27   | 0.65   | 0.71   | 1.05   | 1.20   |
| TNS1                 | 633.02   | 623.36  | 642.69   | 1.03 | 0.04  | 0.75 | 0.93 | 3.06   | 3.86   | 5.07   | 4.63   | 5.42   | 8.38   |
| VEGFA                | 1585.42  | 2188.03 | 982.80   | 0.45 | -1.15 | 0.00 | 0.00 | 32.61  | 30.65  | 38.83  | 19.37  | 19.11  | 28.51  |
| VRK1                 | 39.83    | 38.87   | 40.79    | 1.05 | 0.07  | 0.89 | 1.00 | 0.75   | 1.20   | 0.58   | 0.56   | 1.54   | 1.38   |
| ZFP36L1              | 3654.80  | 3564.88 | 3744.72  | 1.05 | 0.07  | 0.78 | 0.95 | 136.64 | 129.36 | 217.05 | 242.94 | 201.04 | 283.76 |

Other hundreds of genes were not shown here.

**Table S9 Top 10 GO gene terms belong to Biological Process (BC) found in RNA-Seq data analysis**

| id         | Term <sup>¶</sup>                                              | pval     | Score <sup>#</sup> | Gene                                                                                                                                                          | Breeds |
|------------|----------------------------------------------------------------|----------|--------------------|---------------------------------------------------------------------------------------------------------------------------------------------------------------|--------|
| GO:0006531 | aspartate metabolic process                                    | 0        | 33                 | DDO; GOT1; GOT2                                                                                                                                               | ZD*    |
| GO:0019915 | lipid storage                                                  | 1.16e-07 | 13.2               | HEXB; FITM2; ANGPTL3; DGAT2; PLIN2; LOC106038244                                                                                                              | ZD     |
| GO:0015909 | long-chain fatty acid transport                                | 1.30e-06 | 16.5               | SLC27A1; PPARG; PLIN2; FABP3                                                                                                                                  | ZD     |
| GO:0031643 | positive regulation of myelination                             | 1.19e-05 | 16.5               | NCMAP; TENM4; LOC106038521                                                                                                                                    | ZD     |
| GO:0043537 | negative regulation of blood vessel endothelial cell migration | 1.19e-05 | 16.5               | HRG; THBS1; VASH1                                                                                                                                             | ZD     |
| GO:0006108 | malate metabolic process                                       | 1.19e-05 | 16.5               | MDH1; MDH2; ME1                                                                                                                                               | ZD     |
| GO:0003181 | atrioventricular valve morphogenesis                           | 1.19e-05 | 16.5               | HEYL; CYR61; ZFPM1                                                                                                                                            | ZD     |
| GO:0010891 | negative regulation of sequestering of triglyceride            | 1.19e-05 | 16.5               | PPARG; ABHD5; LOC106038244                                                                                                                                    | ZD     |
| GO:0090131 | mesenchyme migration                                           | 1.19e-05 | 16.5               | ACTA1; ACTA2; TGFB3                                                                                                                                           | ZD     |
| GO:0006631 | fatty acid metabolic process                                   | 1.46e-05 | 6.08               | FA2H; ACSF3; GPAM; ANGPTL3; ABHD5; AACS; FABP3                                                                                                                | ZD     |
| GO:0015760 | glucose-6-phosphate transport                                  | 0        | 15.25              | LOC106029669; G6PC; SLC37A4                                                                                                                                   | LD*    |
| GO:0006642 | triglyceride mobilization                                      | 0        | 15.25              | APOB; SIRT1; LPIN1                                                                                                                                            | LD     |
| GO:0045922 | negative regulation of fatty acid metabolic process            | 0        | 15.25              | LOC106034450; LOC106034451                                                                                                                                    | LD     |
| GO:0045939 | negative regulation of steroid metabolic process               | 0        | 15.25              | LOC106034450; LOC106034451                                                                                                                                    | LD     |
| GO:1904224 | negative regulation of glucuronosyltransferase activity        | 0        | 15.25              | LOC106034450; LOC106034451                                                                                                                                    | LD     |
| GO:0009308 | amine metabolic process                                        | 0        | 15.25              | LOC106048001; LOC106048002                                                                                                                                    | LD     |
| GO:0006958 | complement activation. classical pathway                       | 4.78e-12 | 9.01               | MASP2; C3; C5; C6; C9; C1R; C1S; C8A; C8B; C8G; CFI                                                                                                           | LD     |
| GO:0006957 | complement activation. alternative pathway                     | 1.05e-09 | 11.09              | C3; C5; C9; LOC106041557; C8A; C8B; C8G; CFH                                                                                                                  | LD     |
| GO:0044281 | small molecule metabolic process                               | 2.47e-09 | 2.03               | HPD; PLD4; PHKA2; CA5A; INPP5B; NT5C2; GART; SULT2B1; APOB; OAT; ACSL1; PPIP5K2; NCOA1; NCOA2; GCLC; ACSS2; MINPP1; DDC; HLCS; MOCOS; PPAT; PCK1; IP6K2; ATIC | LD     |
| GO:0006956 | complement activation                                          | 3.96e-09 | 10.17              | LOC106043254; MASP2; C3; LOC106044835; C1S; C8A; C8B; CFH                                                                                                     | LD     |

\* ZD and LD refers to Zhedong White Goose and Landes Goose breeds. ¶ Terms highlighted by green color are associated with lipid mobilization and accumulation in lipid droplets. # Score is short for enrichment score for GO terms.

**Table S10 Effects of sex, house, and workers on phenotypes\***

| Phenotypes \ Factors | Sex (p values)   | Worker (p values) | Farm house (p values) |
|----------------------|------------------|-------------------|-----------------------|
| RLW                  | 1.17% (0.011)    | 3.82% (1.06e-4)   | 3.37% (3.98e-5)       |
| FLW                  | 0.17% (0.65)     | 1.17% (0.038)     | 0.61% (0.05)          |
| Pstwt                | 6.11% (3.81e-8)  | 2.56% (1.8e-3)    | 2.63% (2.6e-4)        |
| Prewt                | 20.44% (<2.2-16) | 1.52% (0.018)     | 1.64% (3.3e-3)        |

\*A linear model was used to estimate the effects from sex, worker and farm house on different phenotypes.
